# Supplementary material for: Sensitivity of free tropospheric carbon monoxide to atmospheric weather states and their persistency: an observational assessment over the Nordic countries
Source: Copernicus journal article supplement (doi:10.5194/acp-14-11545-2014), 2014-11-03
Supplement: Supplementary file 1 [file acp-14-11545-2014-supplement.pdf]

Supplement of Atmos. Chem. Phys., 14, 11545–11555, 2014  
<http://www.atmos-chem-phys.net/14/11545/2014/>  
doi:10.5194/acp-14-11545-2014-supplement  
© Author(s) 2014. CC Attribution 3.0 License.

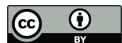

*Supplement of*

## **Sensitivity of free tropospheric carbon monoxide to atmospheric weather states and their persistency: an observational assessment over the Nordic countries**

**M. A. Thomas and A. Devasthale**

*Correspondence to:* M. A. Thomas (manu.thomas@smhi.se)

Supplementary figures:

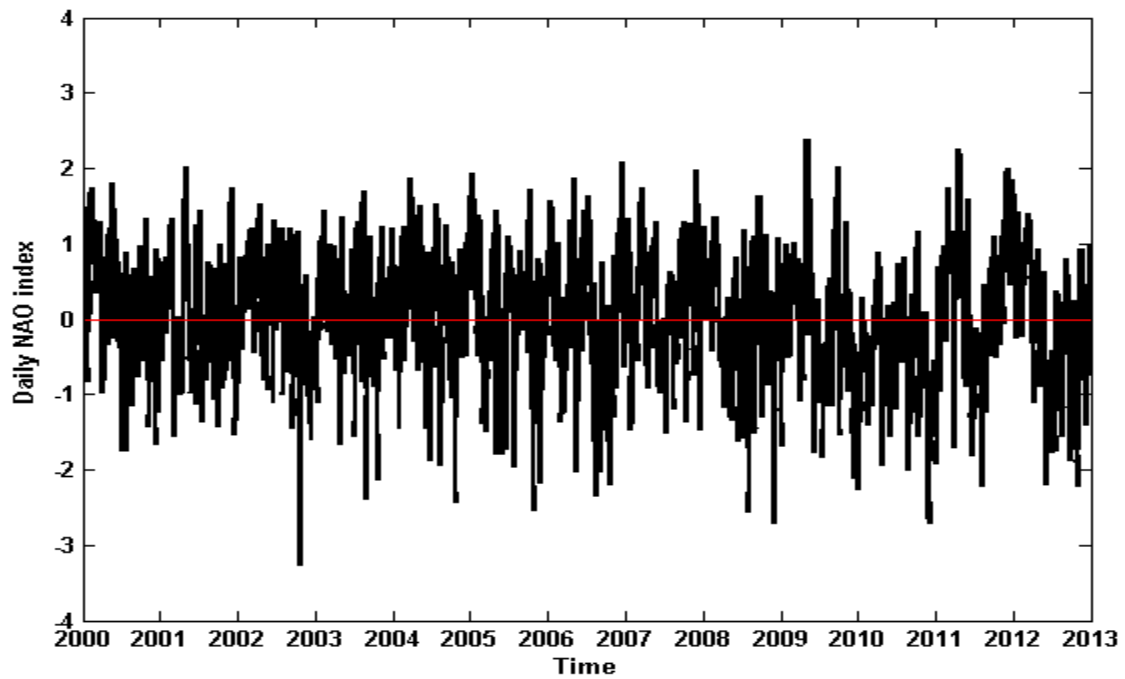

Fig. S1: Time series of daily NAO index. The indices are taken from: <http://www.cpc.ncep.noaa.gov/products/precip/CWlink/pna/nao.shtml>

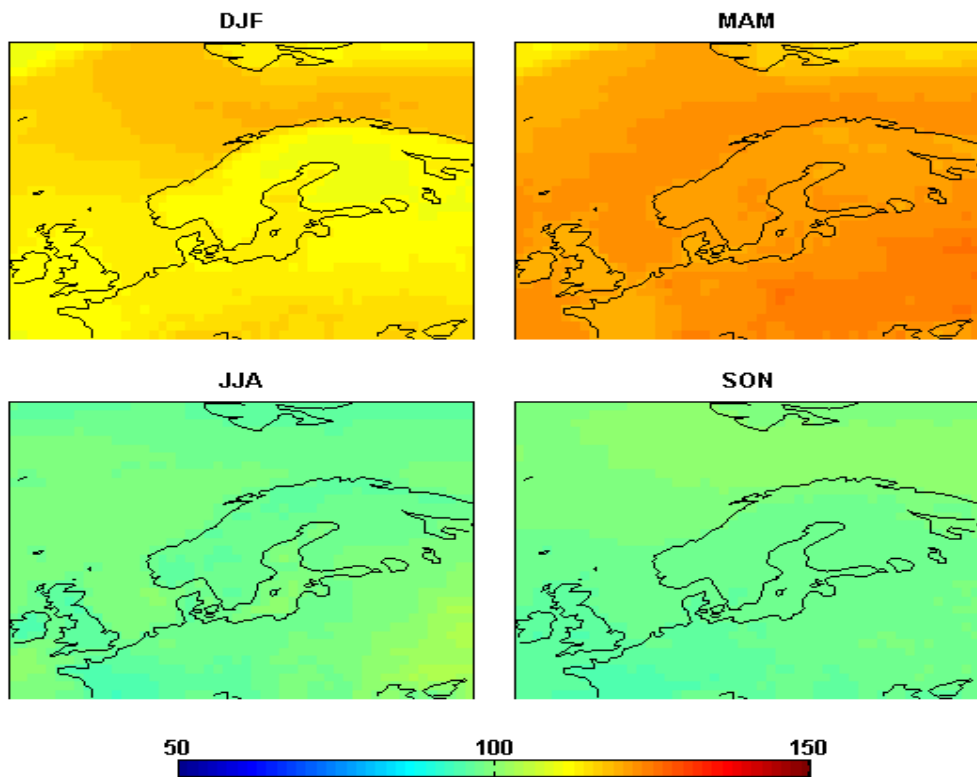

Fig. S2: Mean seasonal CO (in ppbv) over the study area at 500 hPa. The entire 11-yr AIRS record is used to compute means.

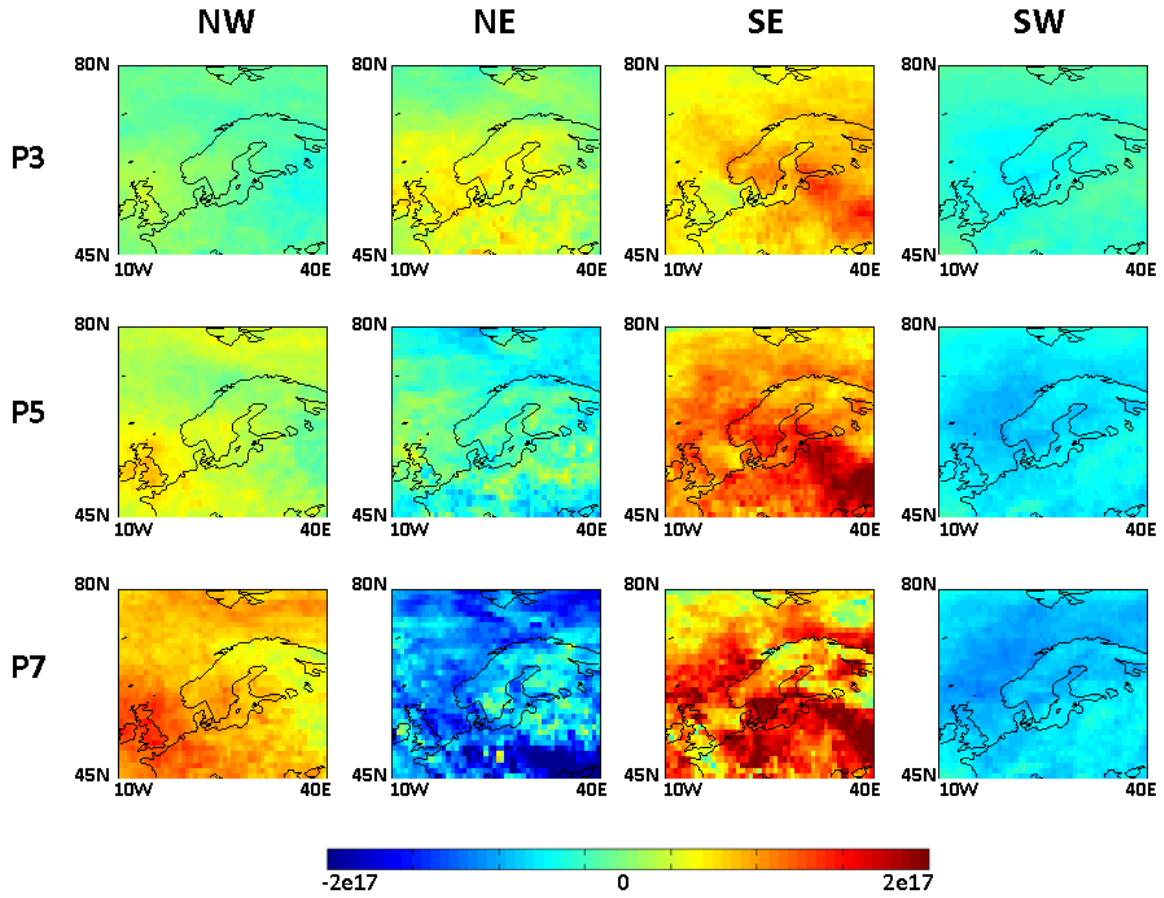

Fig. S3: Total column CO anomalies (in molecules/cm<sup>2</sup>) under different wind conditions.
